# Supplementary material for: Conserved Pib2 regions have distinct roles in TORC1 regulation at the vacuole
Source: PubMed Central journal article supplement (PMC9584352; doi:10.1242/jcs.259994), 2022-09-14
Supplement: joces-135-259994-s1.pdf [file joces-135-259994-s1.pdf]

# Supplementary Figure 1.

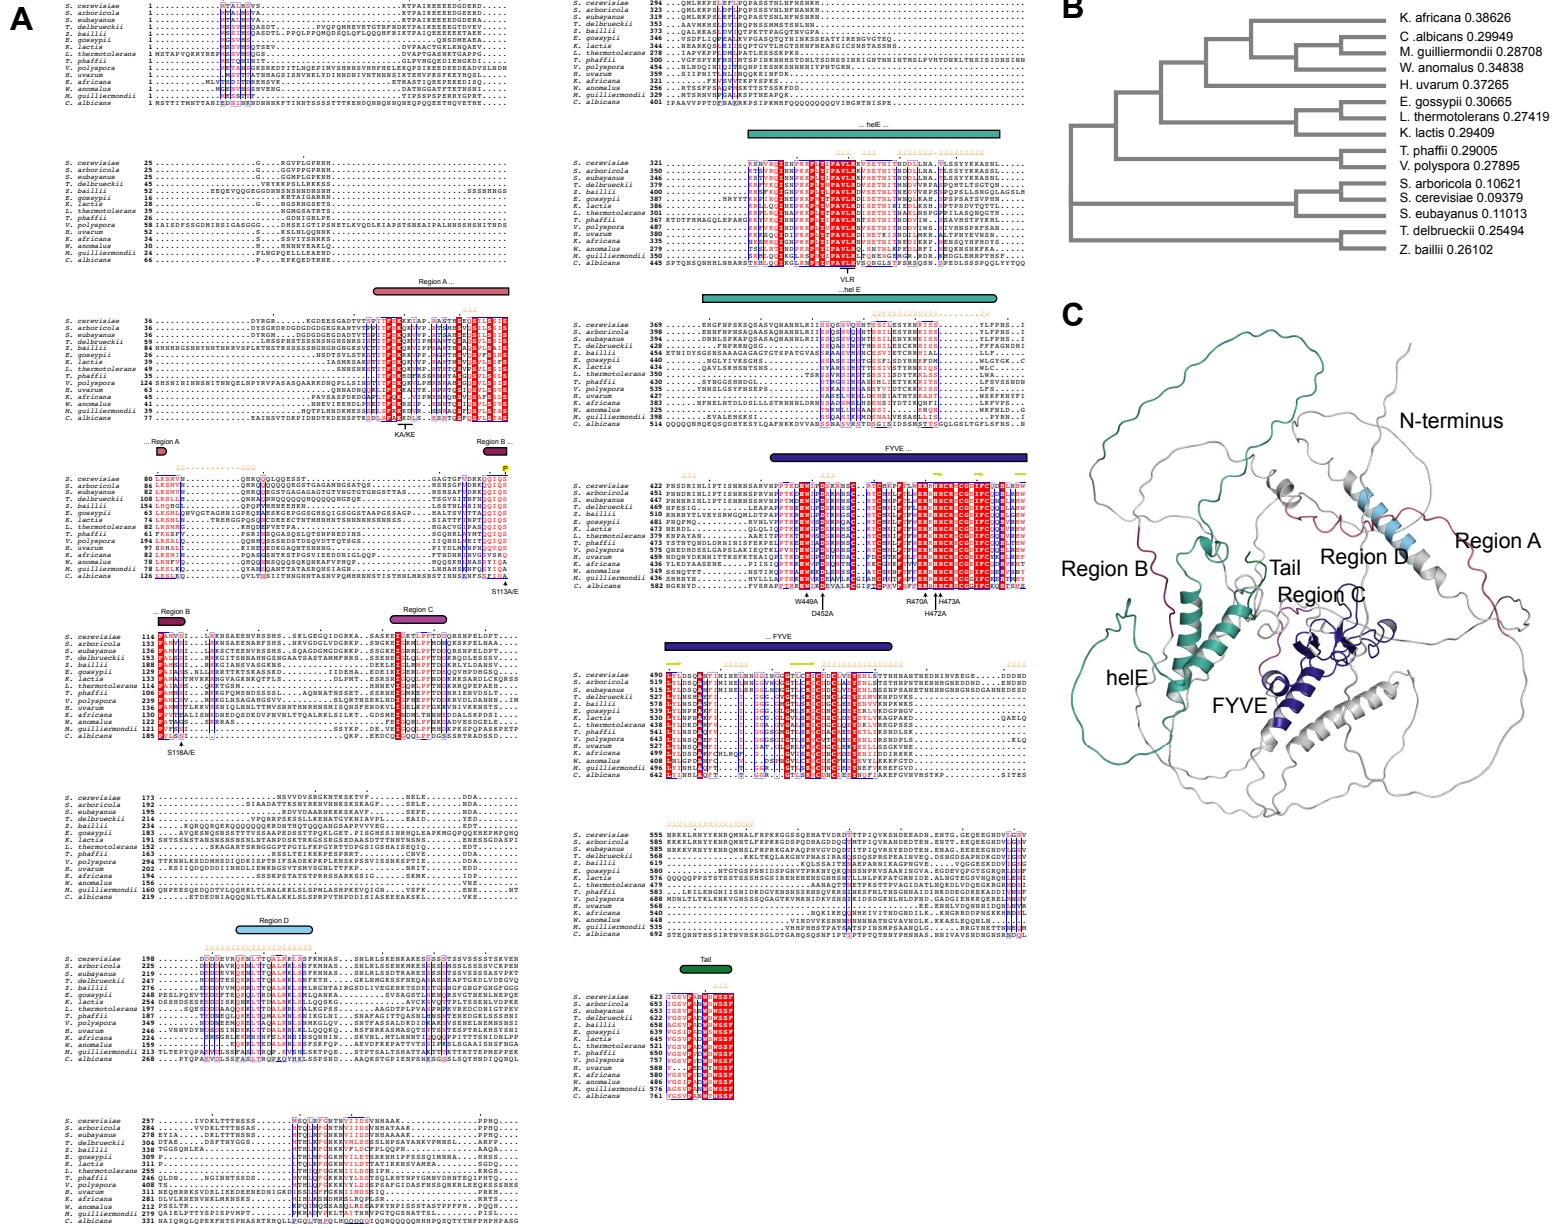

**Figure S1.** (A) Sequence alignments of Pib2 sequences from ascomycete fungi. Conserved Pib2 regions are labeled as per the *S. cerevisiae* sequence. Identical residues are highlighted in red boxes. Residues with > 70% conservation are colored in red. AlphaFold2 predicted structural elements are indicated above the sequence with alpha-helices represented by orange loops and beta-sheets represented by green arrows. Key conserved residues are shown with arrows below the sequence. Predicted post-translational modifications are shown above the sequence with phosphorylation represented by a P. The sequences used in this alignment are: *Kazachstania Africana* (XP\_003958048.1), *Hanseniaspora uvarum* (KKA03925.1), *Candida albicans* (KGU35957.1), *Meyerozyma guilliermondii* (XP\_001484326.1), *Wickerhamomyces anomalus* (XP\_019038326.1), *Tetrapisispora phaffii* (XP\_003687734.1), *Vanderwaltozyma polyspora* (XP\_001644984.1), *Eremothecium gossypii* (NP\_986037.1), *Kluyveromyces lactis* (XP\_452960.1), *Lachancea thermotolerans* (XP\_002553804.1), *Saccharomyces arboricola* (EJS43738.1), *Saccharomyces cerevisiae* (NP\_011492.3), *Saccharomyces eubayanus* (XP\_018222201.1), *Torulaspora delbrueckii* (XP\_003682272.1), *Zygosacharomyces bailli* (SJM87752.1). (B) Cladogram of ascomycete species in A generated with sequence alignment. Scores shown to the right of the species name represent the evolutionary sequence distances. (C) AlphaFold2 prediction of structural elements in Pib2 (PDB AF-P53191-F1-model\_v1). Conserved regions are colored to match map in Fig. 1A.

## Supplementary Figure 2.

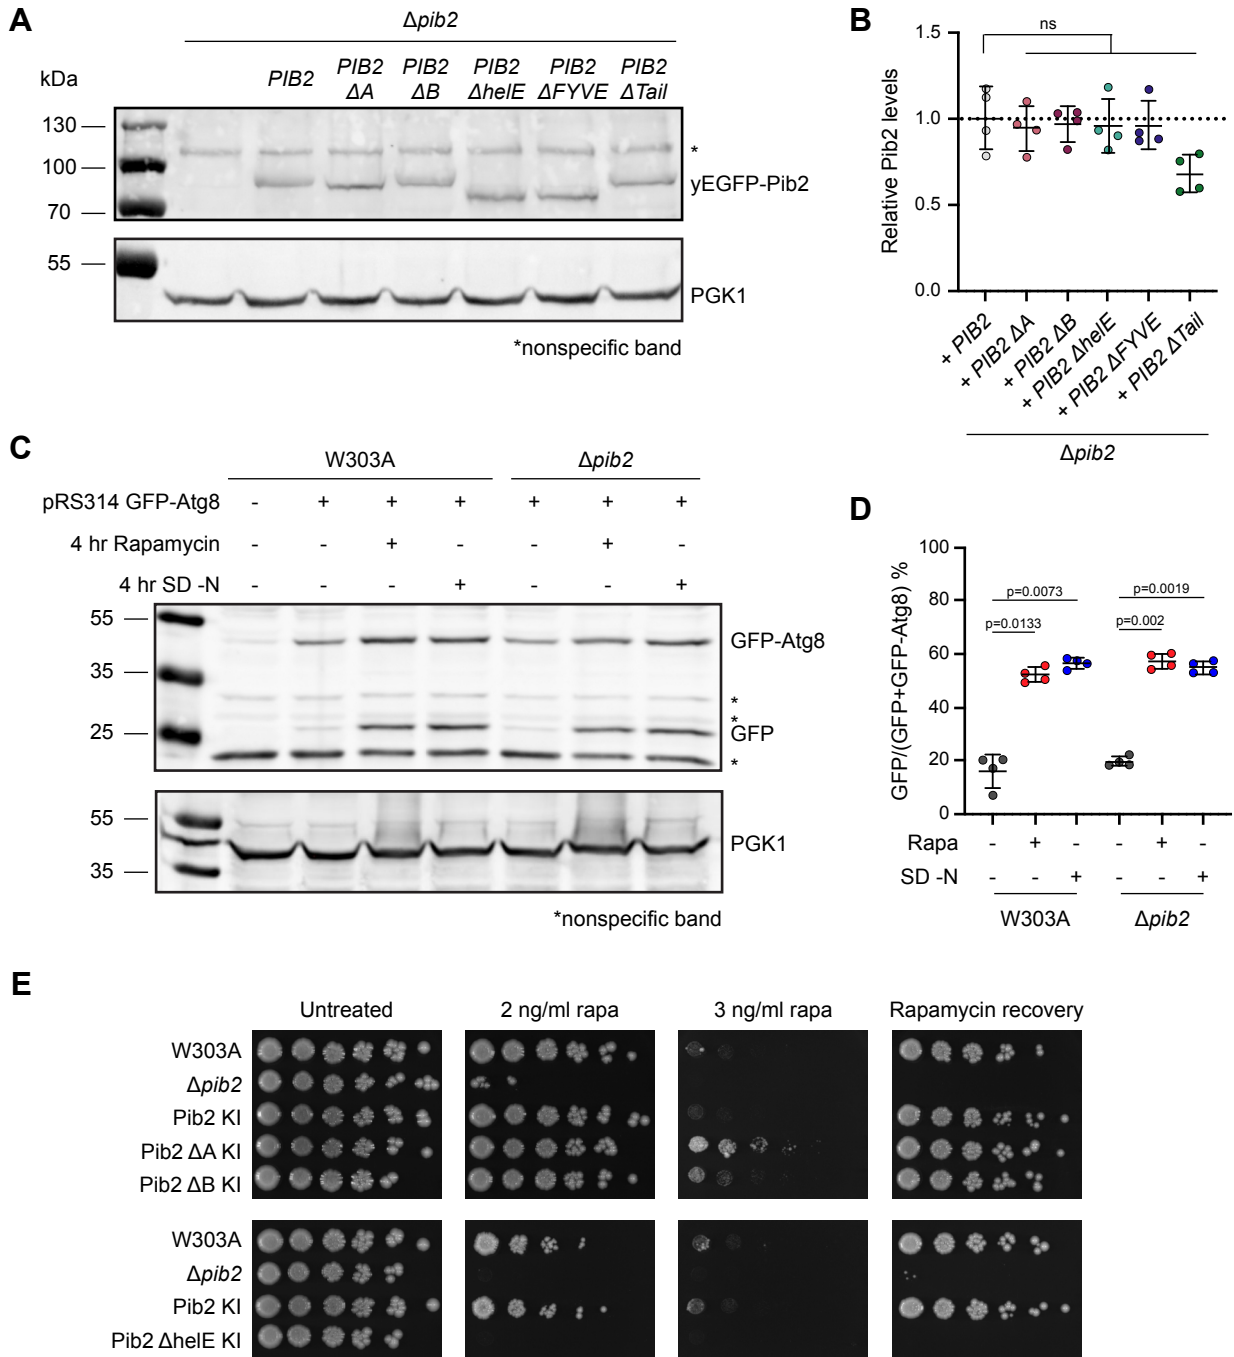

**Fig. S2.** (A) Representative western blot for relative protein expression levels of select yEGFP-Pib2 constructs. (B) Quantification (mean±s.d.) of the blots in A (n=4). Values were normalized to the corresponding Pgc1 loading control. Differences were evaluated by one-way ANOVA (F = 2.488, P = 0.1678). There were no significant differences from Pib2 expression levels as determined by Tukey multiple comparisons test. (C) Representative western blot assessing induction of autophagy. W303A or  $\Delta pib2$  cells expressing GFP-Atg8 were treated with rapamycin or nitrogen starved for 4 hours. GFP-Atg8 and free GFP were detected using an anti-GFP antibody. (D) Quantification (mean±s.d.) of the blots in C (n=4). Differences in the ratios of free GFP to total GFP for each condition were evaluated by one-way ANOVA (F = 117.3, P < 0.0001). Significant differences between untreated and treated cells as determined by Tukey post-hoc multiple comparison tests are denoted. No significant differences were observed in comparing W303A and  $\Delta pib2$  cells. (E) Rapamycin exposure and recovery assays of endogenous Pib2 deletion strains performed as described in Figure 1.

### Supplementary Figure 3.

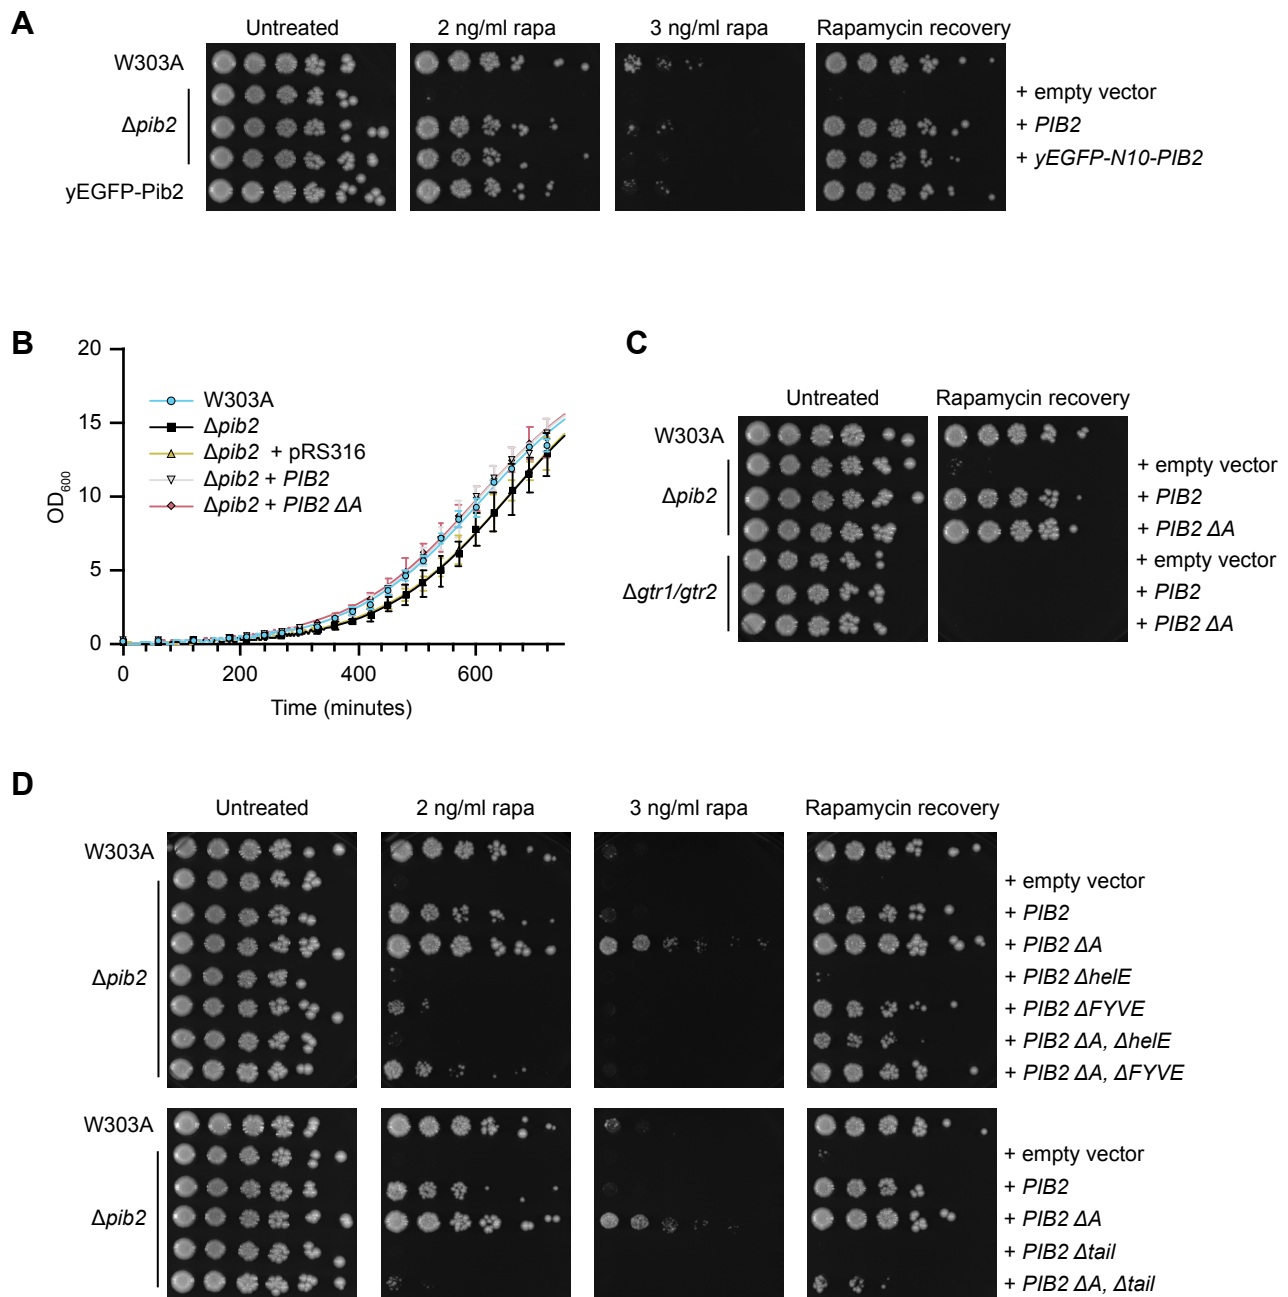

**Fig. S3.** (A) Rapamycin exposure and recovery assays of an endogenously tagged yEGFP-Pib2 strain performed as in Figure 1. (B) 12-hour growth curve of select yeast strains expressing the indicated Pib2 constructs. (C) Rapamycin exposure and recovery assays of  $\Delta pib2$  or  $\Delta gtr1/gtr2$  cells expressing Pib2  $\Delta A$ . Assays performed as in Figure 1, except for rapamycin recovery cells were treated with rapamycin for 2 hours. (D) Rapamycin exposure and recovery assays of  $\Delta pib2$  cells expressing the indicated constructs. These assays were performed as in Figure 1, except for rapamycin recovery cells were treated with rapamycin for 2 hours.

### Supplementary Figure 4.

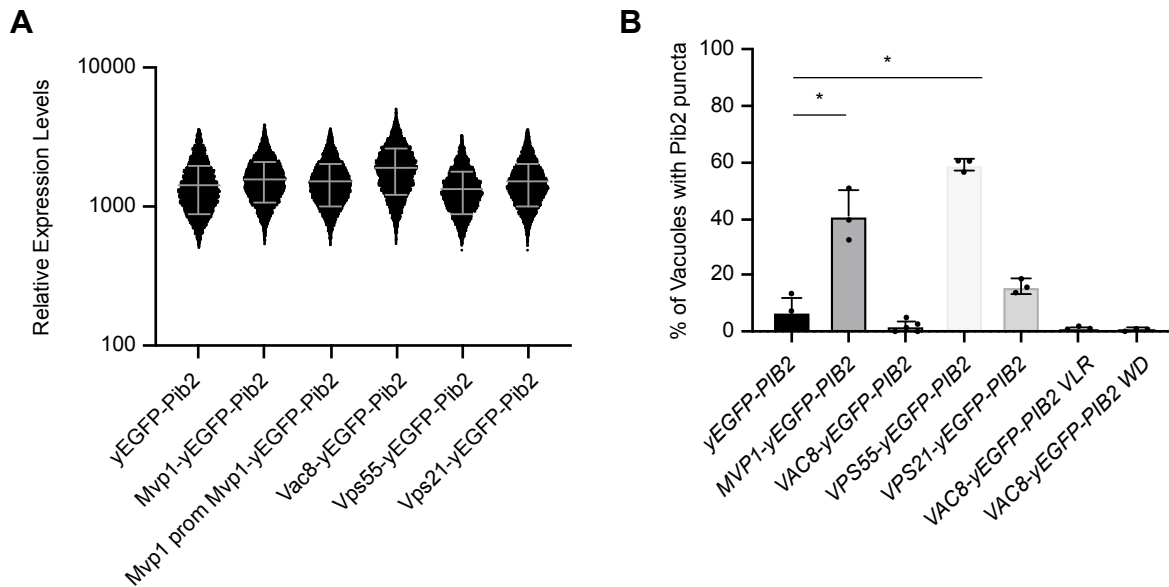

**Fig. S4.** (A) Quantification (mean $\pm$ s.d.) of protein expression of targeting constructs based on total GFP fluorescence detected in individual cells normalized to area. 6112-9481 cells were quantified in each case. (B) Quantification (mean $\pm$ s.d.), from z-stack images, of the percentage of vacuoles containing Pib2 puncta in  $\Delta$ *pib2* cells expressing the indicated constructs. Differences were assessed by one-way ANOVA ( $F = 97.36$ ,  $P < 0.0001$ ). Significant differences from yEGFP-Pib2 are noted (\* $p < 0.0001$ ).

### Supplementary Figure 5.

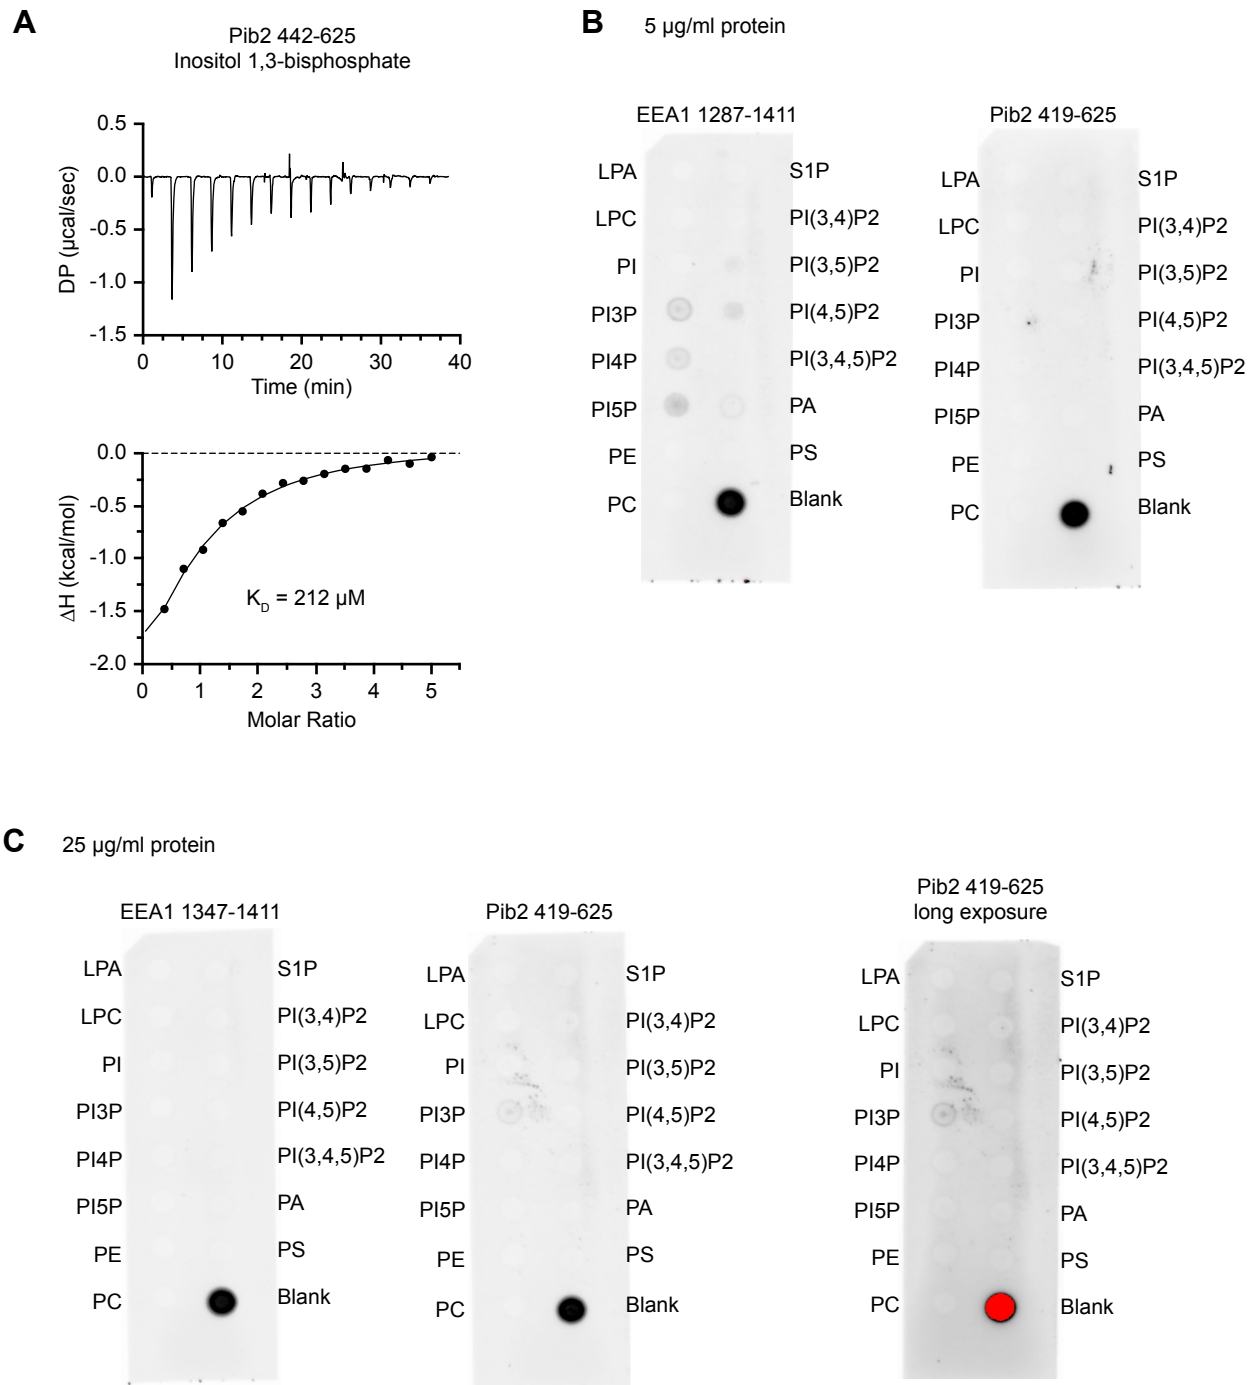

**Fig. S5.** (A) Binding of inositol 1,3 bisphosphate to S cer. Pib2 442-625 as determined by ITC. The upper panel is a representative thermogram (DP – differential power) and the lower panel is a representative normalized binding isotherm obtained by integration of the peaks shown in the thermogram. The fit is obtained from a single-site binding model (smooth line). The mean determined KD value is shown on the isotherm. (B) Binding of 5 µg/ml of the indicated purified proteins to lipids on a PIP strip. Protein binding determined by anti-His antibody. (C) Binding of 25 µg/ml of the indicated purified proteins to lipids on a PIP strip.



### Supplementary Figure 6.

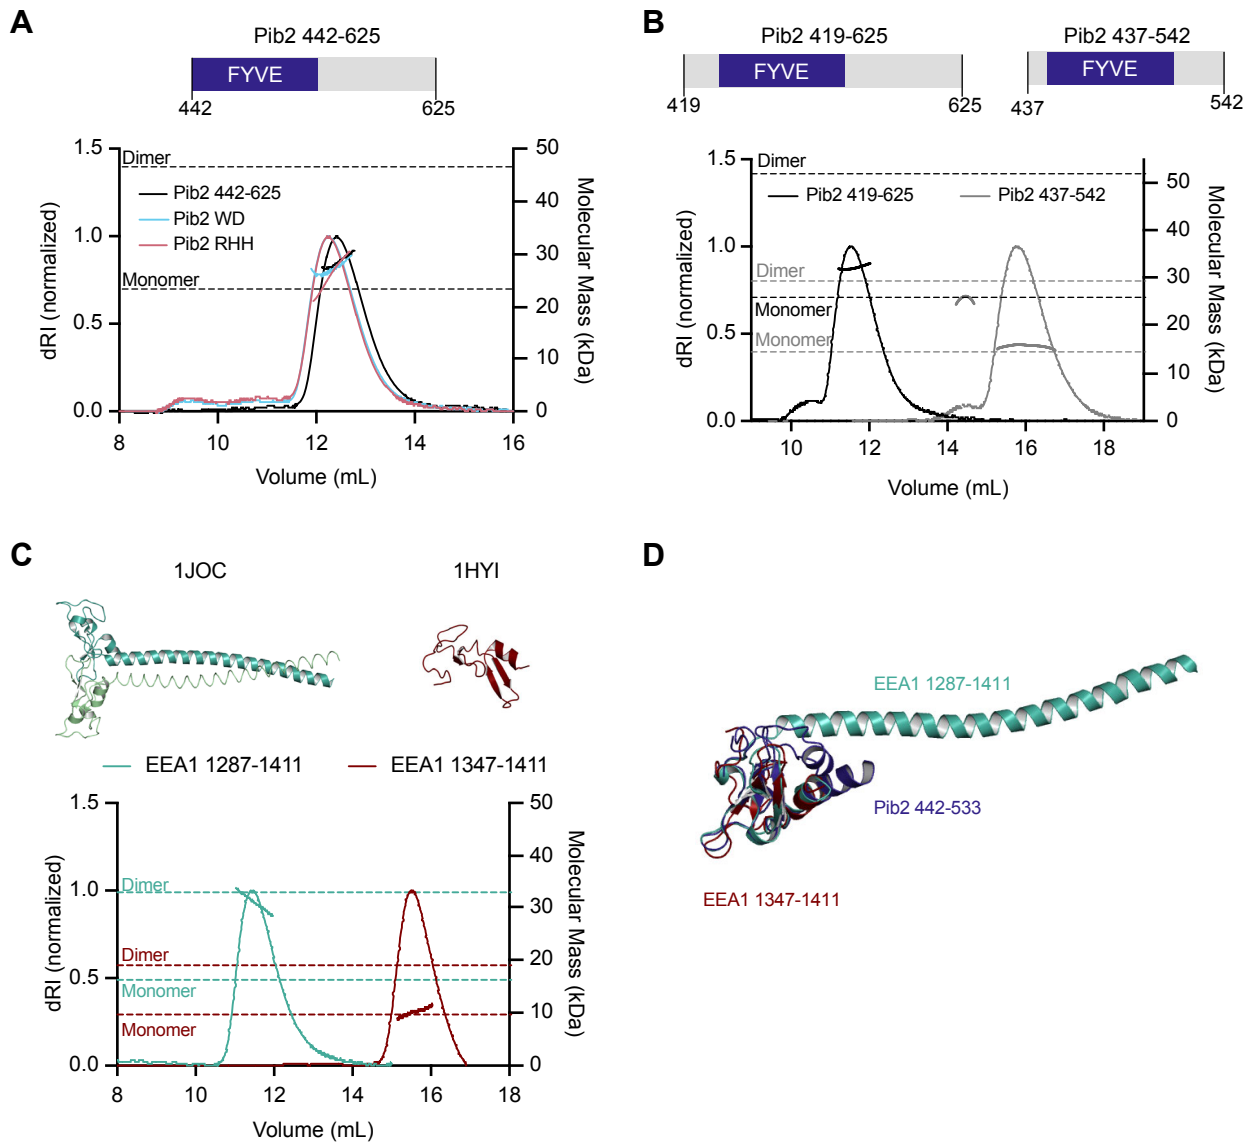

**Fig. S6. SEC-MALS** (A) Determination of the molar mass of Pib2 442-625 and indicated mutants by SEC-MALS. The theoretical molecular masses of monomers and dimers are shown as dotted lines. (B) Determination of the molar mass of Pib2 419-625 and Pib2 437-542. (C) Determination of the molar mass of two EEA1 FYVE constructs. Boundaries determined from existing structures: EEA1 1287-1411 (PDB: 1JOC) and EEA1 1347-1411 (PDB: 1HYI). (D) Aligned FYVE domains comparing the structures of EEA1 1287-1411 and EEA1 1347-1411 to the AlphaFold2 predicted structure of the Pib2 FYVE domain (residues 442-533). Alignment rendered in PyMOL.



### Supplementary Figure 7.

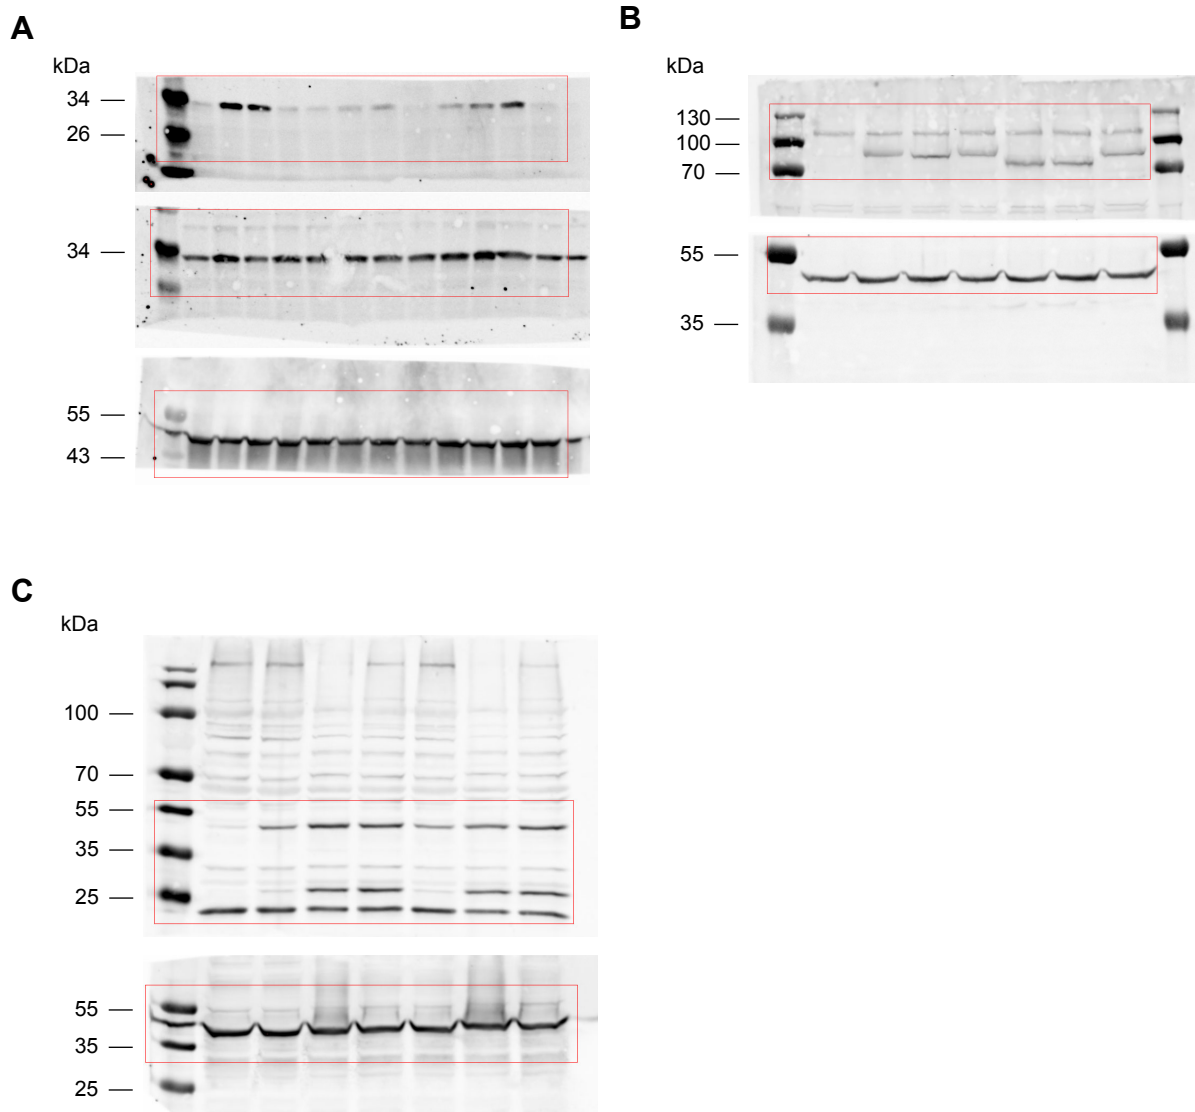

**Fig. S7.** Blot Transparency Original blots from cropped images in prior figures. Cropped region shown in supplemental figure highlighted by red box. (A) Western blots from Figure 4D. (B) Western blots from Supplemental Figure 2A. (C) Western blots from Supplemental Figure 2C.

**Table S1. ITC Data**

| Construct                                       | Cell Concentration ( $\mu\text{M}$ ) | Syringe Concentration (mM) | $K_D$ (M) $\pm$ error of the fit |
|-------------------------------------------------|--------------------------------------|----------------------------|----------------------------------|
| <b>Ins(1,3)P2</b>                               |                                      |                            |                                  |
| His6-S cer. PIB2 442-625                        | 75                                   | 2                          | 51.3E-6 $\pm$ 126E-6             |
| His6-S cer. PIB2 442-625                        | 100                                  | 4                          | 87.3E-6 $\pm$ 48.4E-6            |
| His6-S cer. PIB2 442-625                        | 150                                  | 4                          | 178E-6 $\pm$ 69.4E-6             |
| His6-S cer. PIB2 442-625                        | 150                                  | 4                          | 224E-6 $\pm$ 91.7E-6             |
| His6-S cer. PIB2 442-625                        | 150                                  | 4                          | 520E-6 $\pm$ 355E-6              |
| His6-S cer. PIB2 442-625<br>R470A, H472A, H473A | 100                                  | 4                          | No binding                       |
| His6-S cer. PIB2 419-625                        | 200                                  | 3                          | 293E-6 $\pm$ 402E-6              |
| His6-EEA1 1347-1411                             | 200                                  | 3                          | 310E-6 $\pm$ 2.02E-3             |
| His6-EEA1 1287-1411                             | 200                                  | 3                          | 95.8E-6 $\pm$ 53.1E-6            |
| <b>DiC4 PI3P</b>                                |                                      |                            |                                  |
| His6-S cer. PIB2 442-625                        | 150                                  | 2                          | 145E-6 $\pm$ 271E-6              |
| His6-S cer. PIB2 442-625                        | 150                                  | 2                          | 1.03E-3 $\pm$ 8.57E-3            |
| His6-S cer. PIB2 442-625                        | 150                                  | 2                          | 87.2E-6 $\pm$ 35E-6              |
| His6-S cer. PIB2 442-625                        | 150                                  | 2                          | 1.55E-3 $\pm$ 23.4E-3            |
| His6-S cer. PIB2 442-625                        | 150                                  | 2                          | 881E-6 $\pm$ 4.32E-3             |
| His6-S cer. PIB2 442-625                        | 153                                  | 3                          | 725E-6 $\pm$ 809E-6              |

**Table S2. Yeast strains used in this work**

| Strain        | Genotype                                                                                                                                                                       | Reference                 |
|---------------|--------------------------------------------------------------------------------------------------------------------------------------------------------------------------------|---------------------------|
| W303A         | <i>MATa</i> ; <i>ade2-1</i> ; <i>leu2-3,112</i> ; <i>his3-11,15</i> ; <i>trp1-1</i> ; <i>ura3-1</i> ; <i>can1-100</i>                                                          |                           |
| W303 $\alpha$ | <i>MAT<math>\alpha</math></i> ; <i>ade2-1</i> ; <i>leu2-3,112</i> ; <i>his3-11,15</i> ; <i>trp1-1</i> ; <i>ura3-1</i> ; <i>can1-100</i>                                        |                           |
| PY_126        | <i>MATa</i> ; <i>ade2-1</i> ; <i>leu2-3,112</i> ; <i>his3-11,15</i> ; <i>trp1-1</i> ; <i>ura3-1</i> ; <i>can1-100</i> ; $\Delta$ <i>pib2::KAN</i>                              | Varlakhanova et al., 2017 |
| PY_128        | <i>MATa</i> ; <i>ade2-1</i> ; <i>leu2-3,112</i> ; <i>his3-11,15</i> ; <i>trp1-1</i> ; <i>ura3-1</i> ; <i>can1-100</i> ; $\Delta$ <i>pib2::HIS3</i>                             | This work                 |
| PY_104        | <i>MATa</i> ; <i>ade2-1</i> ; <i>leu2-3,112</i> ; <i>his3-11,15</i> ; <i>trp1-1</i> ; <i>ura3-1</i> ; <i>can1-100</i> ; $\Delta$ <i>gtr1::HIS3</i> ; $\Delta$ <i>gtr2::KAN</i> | Varlakhanova et al., 2017 |
| PY_262        | <i>MATa</i> ; <i>ade2-1</i> ; <i>leu2-3,112</i> ; <i>his3-11,15</i> ; <i>trp1-1</i> ; <i>ura3-1</i> ; <i>can1-100</i> ; <i>yEGFP-N10-PIB2::HIS3</i>                            | This work                 |
| PY_270        | <i>MATa</i> ; <i>ade2-1</i> ; <i>leu2-3,112</i> ; <i>his3-11,15</i> ; <i>trp1-1</i> ; <i>ura3-1</i> ; <i>can1-100</i> ; <i>PIB2::KAN</i>                                       | This work                 |
| PY_272        | <i>MATa</i> ; <i>ade2-1</i> ; <i>leu2-3,112</i> ; <i>his3-11,15</i> ; <i>trp1-1</i> ; <i>ura3-1</i> ; <i>can1-100</i> ; <i>PIB2 <math>\Delta</math>B::KAN</i>                  | This work                 |
| PY_274        | <i>MATa</i> ; <i>ade2-1</i> ; <i>leu2-3,112</i> ; <i>his3-11,15</i> ; <i>trp1-1</i> ; <i>ura3-1</i> ; <i>can1-100</i> ; <i>PIB2 <math>\Delta</math>A::KAN</i>                  | This work                 |
| PY_282        | <i>MATa</i> ; <i>ade2-1</i> ; <i>leu2-3,112</i> ; <i>his3-11,15</i> ; <i>trp1-1</i> ; <i>ura3-1</i> ; <i>can1-100</i> ; $\Delta$ <i>pib2::HIS3</i> ; $\Delta$ <i>vps4::KAN</i> | This work                 |
| PY_284        | <i>MATa</i> ; <i>ade2-1</i> ; <i>leu2-3,112</i> ; <i>his3-11,15</i> ; <i>trp1-1</i> ; <i>ura3-1</i> ; <i>can1-100</i> ; <i>PIB2 <math>\Delta</math>helE::KAN</i>               | This work                 |

**Table S3. Plasmids used in this work**

| Plasmid                  |                                                                    | Reference                 |
|--------------------------|--------------------------------------------------------------------|---------------------------|
| <i>S cer. PIB2</i>       | pRS316 <i>S cer. PIB2</i> + UTRs                                   | This work                 |
| <i>PIB2</i> ΔA           | pRS316 <i>S cer. PIB2</i> del A (del 54-81) + UTRs                 | This work                 |
| <i>PIB2</i> ΔB           | pRS316 <i>S cer. PIB2</i> del B (del 109-118) + UTRs               | This work                 |
| <i>PIB2</i> ΔC           | pRS316 <i>S cer. PIB2</i> del C (del 152-162) + UTRs               | This work                 |
| <i>PIB2</i> ΔD           | pRS316 <i>S cer. PIB2</i> del D (del 205-219) + UTRs               | This work                 |
| <i>PIB2</i> ΔheIE        | pRS316 <i>S cer. PIB2</i> del heIE (del 298-418) + UTRs            | This work                 |
| <i>PIB2</i> ΔFYVE        | pRS316 <i>S cer. PIB2</i> del FYVE (del 442-533) + UTRs            | This work                 |
| <i>PIB2</i> ΔTail        | pRS316 <i>S cer. PIB2</i> del Tail (del 626-635) + UTRs            | This work                 |
| yEGFP- <i>PIB2</i>       | pRS316 yEGFP-N10- <i>S cer. PIB2</i> + UTRs                        | Varlakhanova et al., 2017 |
| yEGFP- <i>PIB2</i> ΔA    | pRS316 yEGFP-N10- <i>S cer. PIB2</i> del A (del 54-81) + UTRs      | This work                 |
| yEGFP- <i>PIB2</i> ΔB    | pRS316 yEGFP-N10- <i>S cer. PIB2</i> del B (del 109-118) + UTRs    | This work                 |
| yEGFP- <i>PIB2</i> ΔC    | pRS316 yEGFP-N10- <i>S cer. PIB2</i> del C (del 152-162) + UTRs    | This work                 |
| yEGFP- <i>PIB2</i> ΔD    | pRS316 yEGFP-N10- <i>S cer. PIB2</i> del D (del 205-219) + UTRs    | This work                 |
| yEGFP- <i>PIB2</i> ΔheIE | pRS316 yEGFP-N10- <i>S cer. PIB2</i> del heIE (del 298-418) + UTRs | This work                 |
| yEGFP- <i>PIB2</i> ΔFYVE | pRS316 yEGFP-N10- <i>S cer. PIB2</i> del FYVE (del 442-533) + UTRs | This work                 |
| yEGFP- <i>PIB2</i> ΔTail | pRS316 yEGFP-N10- <i>S cer. PIB2</i> del Tail (del 626-635) + UTRs | This work                 |
| <i>PIB2</i> VLR          | pRS316 <i>S cer. PIB2</i> 339VLR341->AAA + UTRs                    | This work                 |
| yEGFP- <i>PIB2</i> VLR   | pRS316 yEGFP-N10- <i>S cer. PIB2</i> 339VLR341->AAA + UTRs         | This work                 |
| <i>PIB2</i> RQI          | pRS316 <i>S cer. PIB2</i> 325RQI327->AAA + UTRs                    | This work                 |
| yEGFP- <i>PIB2</i> RQI   | pRS316 yEGFP-N10- <i>S cer. PIB2</i> 325RQI327->AAA + UTRs         | This work                 |
| <i>PIB2</i> PKK          | pRS316 <i>S cer. PIB2</i> 330PKK332->AAA + UTRs                    | This work                 |
| yEGFP- <i>PIB2</i> PKK   | pRS316 yEGFP-N10- <i>S cer. PIB2</i> 330PKK332->AAA + UTRs         | This work                 |
| <i>PIB2</i> PLY          | pRS316 <i>S cer. PIB2</i> 333PLY335->AAA + UTRs                    | This work                 |
| yEGFP- <i>PIB2</i> PLY   | pRS316 yEGFP-N10- <i>S cer. PIB2</i> 333PLY335->AAA + UTRs         | This work                 |

|                                            |                                                                            |           |
|--------------------------------------------|----------------------------------------------------------------------------|-----------|
| <i>PIB2</i> WD                             | pRS316 <i>S cer. PIB2</i> W449A, D452A + UTRs                              | This work |
| yEGFP- <i>PIB2</i> WD                      | pRS316 yEGFP-N10-S <i>cer. PIB2</i> W449A, D452A + UTRs                    | This work |
| <i>PIB2</i> RHH                            | pRS316 <i>S cer. PIB2</i> R470A, H472A, H473A + UTRs                       | This work |
| yEGFP- <i>PIB2</i> RHH                     | pRS316 yEGFP-N10-S <i>cer. PIB2</i> R470A, H472A, H473A + UTRs             | This work |
| yEGFP- <i>PIB2</i> Δ <i>heI</i> E ΔFYVE    | pRS316 yEGFP-N10-S <i>cer. PIB2</i> del <i>heI</i> E del FYVE + UTRs       | This work |
| <i>PIB2</i> KA                             | pRS316 <i>S cer. PIB2</i> 59KKK61->AAA + UTRs                              | This work |
| yEGFP- <i>PIB2</i> KA                      | pRS316 yEGFP-N10-S <i>cer. PIB2</i> 59KKK61->AAA + UTRs                    | This work |
| <i>PIB2</i> KE                             | pRS316 <i>S cer. PIB2</i> 59KKK61->EEE + UTRs                              | This work |
| <i>PIB2</i> KR                             | pRS316 <i>S cer. PIB2</i> 59KKK61->RRR + UTRs                              | This work |
| <i>PIB2</i> SA                             | pRS316 <i>S cer. PIB2</i> S113A, S118A + UTRs                              | This work |
| yEGFP- <i>PIB2</i> SA                      | pRS316 yEGFP-N10-S <i>cer. PIB2</i> S113A, S118A + UTRs                    | This work |
| <i>PIB2</i> SE                             | pRS316 <i>S cer. PIB2</i> S113E, S118E + UTRs                              | This work |
| <i>PIB2</i> KA SA                          | pRS316 <i>S cer. PIB2</i> 59KKK61->AAA, S113A, S118A + UTRs                | This work |
| <i>PIB2</i> KA SE                          | pRS316 <i>S cer. PIB2</i> 59KKK61->AAA, S113E, S118E + UTRs                | This work |
| <i>PIB2</i> KE SA                          | pRS316 <i>S cer. PIB2</i> 59KKK61->EEE, S113A, S118A + UTRs                | This work |
| <i>PIB2</i> KE SE                          | pRS316 <i>S cer. PIB2</i> 59KKK61->EEE, S113E, S118E + UTRs                | This work |
| <i>PIB2</i> ΔA Δ <i>heI</i> E              | pRS316 <i>S cer. PIB2</i> del A del <i>heI</i> E + UTRs                    | This work |
| <i>PIB2</i> ΔA ΔFYVE                       | pRS316 <i>S cer. PIB2</i> del A del FYVE + UTRs                            | This work |
| <i>PIB2</i> ΔA ΔTail                       | pRS316 <i>S cer. PIB2</i> del A del Tail + UTRs                            | This work |
| VAC8-yEGFP- <i>PIB2</i>                    | pRS316 VAC8-yEGFP-N10-S <i>cer. PIB2</i> + <i>PIB2</i> UTRs                | This work |
| MVP1-yEGFP- <i>PIB2</i> + <i>PIB2</i> UTRs | pRS316 <i>S cer. MVP1</i> -yEGFP-N10-S <i>cer. PIB2</i> + <i>PIB2</i> UTRs | This work |
| MVP1-yEGFP- <i>PIB2</i> + MVP1 UTRs        | pRS316 <i>S cer. MVP1</i> -yEGFP-N10-S <i>cer. PIB2</i> + MVP1 UTRs        | This work |
| VAC8-yEGFP- <i>PIB2</i> VLR                | pRS316 VAC8-yEGFP-N10-S <i>cer. PIB2</i> 339VLR341->AAA + <i>PIB2</i> UTRs | This work |
| VAC8-yEGFP- <i>PIB2</i> WD                 | pRS316 VAC8-yEGFP-N10-S <i>cer. PIB2</i> W449A, D452A + <i>PIB2</i> UTRs   | This work |
| VPS55-yEGFP- <i>PIB2</i>                   | pRS316 <i>S cer. VPS55</i> -yEGFP-10-S <i>cer. PIB2</i> + <i>PIB2</i> UTRs | This work |

|                         |                                                             |                                                   |
|-------------------------|-------------------------------------------------------------|---------------------------------------------------|
| <i>VPS21-yEGFP-PIB2</i> | pRS316 <i>S cer. VPS21-yEGFP-10-S cer. PIB2 + PIB2 UTRs</i> | This work                                         |
| <i>PIB2 442-625</i>     | pET-15b <i>S cer. PIB2 442-625</i>                          | This work                                         |
| <i>PIB2 437-542</i>     | pET-15b <i>S cer. PIB2 437-542</i>                          | This work                                         |
| <i>PIB2 419-625</i>     | pET-15b <i>S cer. PIB2 419-625</i>                          | This work                                         |
| <i>EEA1 1287-1411</i>   | pET-15b His6-EEA1(FYVE) 1287-1411                           | Modified from Addgene #36096 (Burd and Emr, 1998) |
| <i>EEA1 1347-1411</i>   | pET-15b His6-EEA1(FYVE) 1347-1411                           | Modified from Addgene #36096 (Burd and Emr, 1998) |
| <i>GFP-ATG8</i>         | pRS314 <i>GFP-ATG8</i>                                      | Modified from Addgene #49425 (Guan et al., 2001)  |
|                         |                                                             |                                                   |
|                         |                                                             |                                                   |
